# Supplementary material
Source: PubMed Central journal article supplement (PMC1691380)
Supplement: 12965032s01.pdf [file 12965032s01.pdf]

These are electronic appendices to the paper by Bierne *et al.* 2003 Habitat preference and the marine speciation paradox. *Proc. R. Soc. Lond. B* **270**, 1399–1406. (DOI 10.1098/rspb.2003.2404.)

Electronic appendices are refereed with the text. However, no attempt has been made to impose a uniform editorial style on the electronic appendices.

**Electronic Appendix A:** Allelic frequencies at the *Glu-5'*, *mac-1* and *EFbis* loci. -: allele absent in sample; (n): sample size.

| stage<br>habitat<br>date | Adults   |      |      |                |                |                | Larvae         |                |                |                |                |                | Recruits       |                |                |                |                |                |                |  |  |
|--------------------------|----------|------|------|----------------|----------------|----------------|----------------|----------------|----------------|----------------|----------------|----------------|----------------|----------------|----------------|----------------|----------------|----------------|----------------|--|--|
|                          | Open Sea |      |      | Sheltered      |                |                | Exposed        |                |                | Sheltered      |                |                | Open Sea       |                |                | Sheltered      |                |                | Open Sea       |  |  |
|                          | (96)     | (96) | (72) | 11-Mar<br>(23) | 29-Mar<br>(22) | 12-Apr<br>(29) | 10-May<br>(18) | 25-May<br>(19) | 07-Jun<br>(26) | 29-Mar<br>(15) | 12-Apr<br>(26) | 26-Apr<br>(19) | 10-May<br>(51) | 25-May<br>(43) | 07-Jun<br>(33) | 29-Mar<br>(21) | 12-Apr<br>(17) | 10-May<br>(58) | 07-Jun<br>(28) |  |  |
| <b><i>Glu-5'</i></b>     |          |      |      |                |                |                |                |                |                |                |                |                |                |                |                |                |                |                |                |  |  |
| G                        | 0.45     | 0.03 | 0.75 | 0.02           | 0.02           | 0.05           | 0.5            | 0.65           | 0.3            | 0.04           | 0.04           | 0.03           | 0.09           | 0.1            | 0.08           | 0.08           | 0.09           | 0.25           | 0.45           |  |  |
| E                        | 0.55     | 0.97 | 0.25 | 0.98           | 0.98           | 0.95           | 0.5            | 0.35           | 0.7            | 0.96           | 0.96           | 0.97           | 0.91           | 0.9            | 0.92           | 0.92           | 0.91           | 0.75           | 0.55           |  |  |
| <b><i>mac-1</i></b>      |          |      |      |                |                |                |                |                |                |                |                |                |                |                |                |                |                |                |                |  |  |
| b1                       | 0.06     | -    | 0.04 | -              | -              | -              | -              | 0.08           | 0.02           | -              | -              | -              | -              | -              | -              | -              | -              | -              | 0.02           |  |  |
| b2                       | -        | -    | -    | -              | -              | -              | -              | 0.05           | -              | -              | -              | -              | -              | -              | -              | -              | -              | 0.01           | -              |  |  |
| b6                       | -        | 0.01 | 0.01 | -              | 0.03           | -              | -              | -              | -              | -              | -              | -              | -              | -              | -              | -              | -              | -              | -              |  |  |
| c1                       | 0.09     | -    | 0.12 | -              | -              | -              | 0.04           | 0.11           | 0.08           | 0.03           | 0.04           | 0.09           | 0.04           | 0.02           | 0.06           | 0.02           | -              | 0.08           | 0.08           |  |  |
| c15                      | -        | -    | 0.01 | -              | -              | -              | -              | -              | -              | -              | -              | -              | -              | -              | -              | -              | -              | -              | -              |  |  |
| c2                       | 0.2      | 0.04 | 0.29 | 0.05           | 0.08           | 0.04           | 0.23           | 0.24           | 0.12           | -              | -              | 0.03           | 0.04           | 0.02           | 0.03           | 0.05           | 0.05           | 0.07           | 0.17           |  |  |
| c3                       | 0.03     | -    | 0.04 | -              | 0.03           | 0.02           | -              | -              | 0.02           | -              | -              | -              | -              | 0.03           | 0.01           | -              | -              | 0.03           | 0.04           |  |  |
| c4                       | 0.02     | -    | -    | -              | -              | -              | -              | 0.05           | -              | 0.03           | 0.02           | 0.02           | 0.01           | -              | 0.01           | -              | -              | 0.01           | 0.06           |  |  |
| a0                       | 0.01     | 0.04 | 0.01 | 0.05           | -              | 0.05           | -              | -              | -              | -              | -              | -              | -              | -              | -              | 0.02           | -              | -              | 0.02           |  |  |
| a1                       | 0.02     | 0.02 | 0.01 | 0.05           | 0.05           | 0.04           | -              | -              | -              | -              | -              | -              | -              | 0.01           | 0.01           | 0.05           | -              | -              | -              |  |  |
| a2                       | 0.2      | 0.15 | 0.06 | 0.11           | 0.21           | 0.14           | 0.04           | -              | 0.04           | 0.06           | 0.05           | 0.1            | 0.06           | 0.06           | 0.01           | 0.14           | 0.18           | 0.05           | 0.23           |  |  |
| a3                       | 0.11     | 0.31 | 0.16 | 0.3            | 0.29           | 0.27           | 0.42           | 0.39           | 0.35           | 0.53           | 0.54           | 0.43           | 0.45           | 0.6            | 0.49           | 0.26           | 0.4            | 0.42           | 0.08           |  |  |
| a4                       | 0.01     | 0.03 | -    | 0.02           | 0.03           | -              | -              | -              | -              | -              | -              | -              | -              | -              | -              | 0.05           | 0.03           | -              | 0.02           |  |  |
| a5                       | 0.24     | 0.39 | 0.18 | 0.43           | 0.29           | 0.43           | 0.27           | 0.08           | 0.37           | 0.33           | 0.32           | 0.31           | 0.39           | 0.24           | 0.34           | 0.4            | 0.33           | 0.34           | 0.23           |  |  |
| a6                       | 0.01     | -    | 0.02 | -              | -              | -              | -              | -              | -              | 0.03           | 0.02           | -              | -              | -              | 0.01           | -              | -              | -              | 0.02           |  |  |
| a7                       | 0.01     | 0.01 | 0.05 | -              | -              | 0.02           | -              | -              | -              | -              | -              | -              | 0.01           | -              | 0.01           | -              | 0.03           | -              | 0.02           |  |  |
| a8                       | -        | -    | -    | -              | -              | -              | -              | -              | -              | -              | -              | -              | -              | -              | -              | -              | -              | -              | -              |  |  |
| a15                      | -        | 0.01 | -    | -              | -              | -              | -              | -              | -              | -              | 0.02           | 0.02           | -              | -              | -              | -              | -              | -              | -              |  |  |
| <b><i>EFbis</i></b>      |          |      |      |                |                |                |                |                |                |                |                |                |                |                |                |                |                |                |                |  |  |
| G-10                     | 0.03     | -    | 0.01 | -              | -              | -              | 0.03           | 0.04           | -              | -              | -              | -              | -              | -              | -              | -              | -              | -              | -              |  |  |
| G-2                      | -        | -    | -    | -              | -              | -              | 0.03           | 0.04           | -              | -              | -              | -              | -              | 0.01           | -              | -              | -              | -              | -              |  |  |
| G-1                      | 0.03     | -    | -    | -              | -              | -              | -              | -              | -              | -              | -              | -              | -              | -              | -              | -              | -              | 0.02           | 0.04           |  |  |
| G0                       | 0.23     | 0.11 | 0.46 | 0.03           | 0.13           | 0.12           | 0.36           | 0.46           | 0.23           | 0.03           | 0.09           | 0.04           | 0.04           | 0.09           | 0.06           | 0.06           | 0.13           | 0.22           | 0.24           |  |  |
| G1                       | 0.03     | 0.01 | 0.03 | 0.03           | 0.03           | -              | -              | -              | -              | -              | -              | -              | -              | -              | 0.01           | -              | -              | -              | 0.06           |  |  |
| G2                       | 0.01     | -    | 0.02 | -              | -              | -              | -              | 0.04           | -              | -              | -              | -              | -              | -              | -              | -              | -              | 0.01           | -              |  |  |
| G3                       | 0.2      | 0.27 | 0.15 | 0.37           | 0.35           | 0.31           | 0.22           | 0.13           | 0.15           | 0.2            | 0.27           | 0.2            | 0.2            | 0.22           | 0.24           | 0.41           | 0.25           | 0.19           | 0.22           |  |  |
| E-3                      | -        | 0.01 | 0.01 | 0.03           | -              | -              | -              | -              | -              | -              | -              | -              | -              | -              | -              | -              | 0.03           | -              | -              |  |  |
| E-2                      | 0.01     | 0.03 | 0.04 | -              | 0.03           | -              | -              | 0.04           | 0.03           | 0.03           | -              | 0.02           | 0.02           | -              | 0.01           | 0.03           | 0.03           | 0.01           | 0.02           |  |  |
| E-1                      | 0.05     | 0.01 | 0.04 | 0.03           | -              | -              | -              | -              | -              | -              | 0.02           | -              | -              | -              | 0.01           | -              | -              | -              | 0.06           |  |  |
| E0                       | 0.42     | 0.53 | 0.26 | 0.5            | 0.43           | 0.48           | 0.36           | 0.25           | 0.58           | 0.73           | 0.59           | 0.74           | 0.74           | 0.65           | 0.65           | 0.38           | 0.53           | 0.54           | 0.35           |  |  |
| E1                       | -        | 0.01 | -    | -              | -              | 0.02           | -              | -              | -              | -              | -              | -              | -              | -              | -              | 0.03           | -              | -              | -              |  |  |
| E2                       | 0.01     | 0.03 | -    | -              | 0.05           | 0.07           | -              | -              | 0.03           | -              | 0.04           | -              | -              | 0.03           | 0.01           | 0.09           | 0.05           | 0.01           | 0.02           |  |  |
